# Supplementary material for: Berry Dietary Interventions in Metabolic Syndrome: New Insights
Source: MDPI journal article supplement (doi:10.3390/nu15081906), 2023-04-14

Figure S1: Risk of bias for each domain assessed within each non-RCT study.

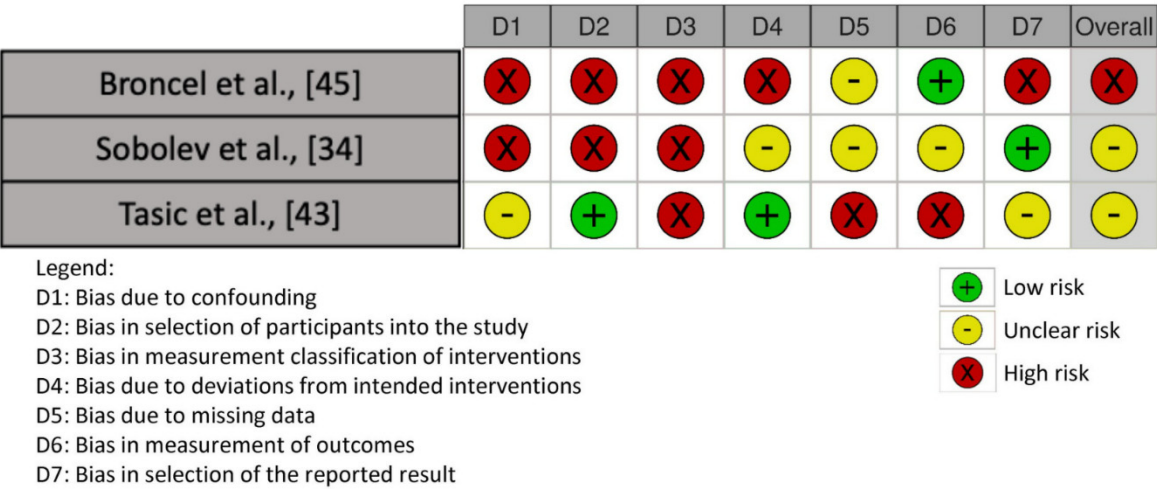

Figure S2: Risk of bias for each domain assessed, shown as a percentage across all the non-RCT studies combined.

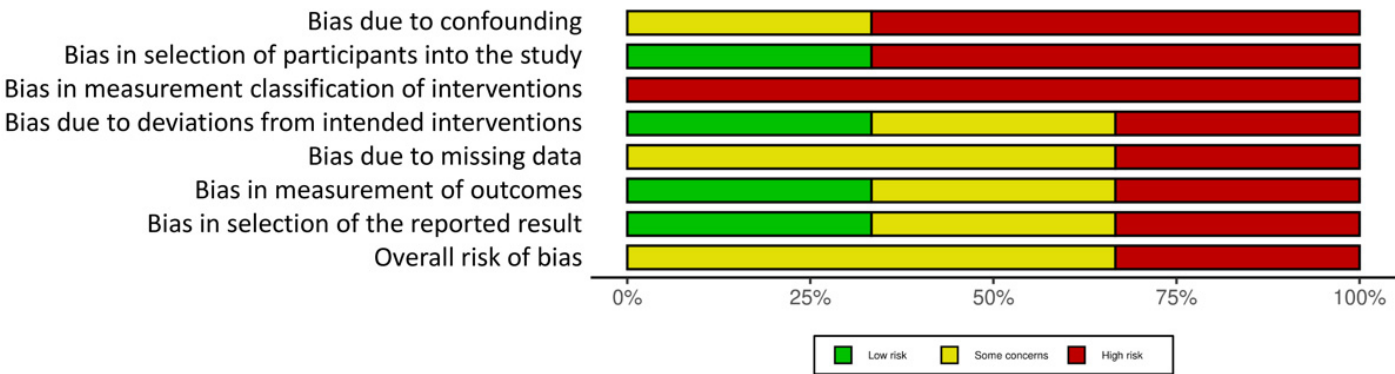

Supplement: s1 [file s1]
