# Supplementary material for: Berry Dietary Interventions in Metabolic Syndrome: New Insights
Source: MDPI journal article supplement (doi:10.3390/nu15081906), 2023-04-14
Supplement: s1 [file s1]

**Supplementary Table 1. Effect of berry intervention on markers of oxidative stress, inflammation, vascular function markers, and other related parameters in the context of MetS**

| Berry     | Oxidative<br>Stress markers                                           | Inflammatory/<br>immune response markers                 | Vascular function<br>markers | Other markers                | Reference and<br>Country             |
|-----------|-----------------------------------------------------------------------|----------------------------------------------------------|------------------------------|------------------------------|--------------------------------------|
| Blueberry |                                                                       |                                                          | = FMD, PWV                   |                              | Curtis et al., 2022                  |
|           |                                                                       |                                                          | = AIX                        |                              | (UK) [32]                            |
|           |                                                                       |                                                          | ↓ AIX@75                     |                              | Curtis et al., 2019                  |
|           |                                                                       |                                                          | ↑↑ FMD, cGMP                 |                              | (UK) [33]                            |
|           |                                                                       | ↓↓↓ IL-6                                                 |                              |                              | Sobolev et al., 2019<br>(Italy) [34] |
|           |                                                                       | ↑↑ TGF-β                                                 |                              |                              |                                      |
|           |                                                                       | = IL-1β, TNF-α,<br>IL-10, IL-4                           |                              |                              |                                      |
|           | ↓ free radical levels in the<br>whole blood and isolated<br>monocytes | ↓ TNF-α, TLR4, IL-6,<br>GMCSF<br>= IFN-α, IL12p70, FLT3L |                              | ↑ myeloid dendritic<br>cells | Nair et al., 2017<br>(USA) [5]       |

↑↑ RHI

Stull et al., 2015  
(USA) [35]

= CRP, IL-6

= sICAM-1, sVCAM-1

= adiponectin

Basu et al., 2010  
(USA) [36]

↓↓ ox-LDL, MDA, HNE

---

## Bilberry

↓ hs-CRP, IL-12, IS  
= IL-6

↓ expression of MMP  
and CCR2 transcripts  
= adiponectin, leptin

Kolehmainen et al.,  
2012  
(Finland) [37]

---

## Cranberry

↓↓ AOPP

= CRP, TNF- $\alpha$ ,

↓↓↓ homocysteine

↑↑ adiponectin

Simao et al.,2013

↓ lipo-peroxidation

IL-1, IL-6

↑ folic acid

(Brazil) [38]

= ox-LDL

= AIX, sICAM-1,  
sVCAM-1, E-selectin,  
NO<sub>x</sub>, MAP

= uric acid, HR

Ruel et al., 2013  
(Canada) [39]

↓ ox-LDL, MDA, HNE

= CRP, IL-6

↑ plasma antioxidant  
capacity

Basu et al., 2011  
(USA) [40]

---

## Raspberry

↓ TNF- $\alpha$ , IL-6, CD34/KDR  
cells

↑ CD34/CD133,  
CD34/CD117 cells

= CRP

↓ sICAM-1, radial  
AIX

= sVCAM-1

↑ adiponectin,  
= HR

Jeong et al., 2016  
(Korea) [41]

↓ IL-6, TNF- $\alpha$

= CRP

↑ FMD

= sICAM, sVCAM

↑ adiponectin

Jeong et al., 2014  
(Korea) [42]

---

## Chokeberry

|            |                                                  |                                                 |                                                |
|------------|--------------------------------------------------|-------------------------------------------------|------------------------------------------------|
|            | ↓ CRP °                                          | = HR, hematological parameters, hepatic profile | Tasic et al., 2021<br>(Poland) [43]            |
|            |                                                  | ↓ platelet aggregation and coagulation          | Sikora et al., 2012<br>(Poland) [44]           |
|            | ↓↓↓ CAT<br>↓↓ ET-1, TBARS<br>↑↑↑ SOD<br>= GSH-Px | = CRP                                           | Broncel et al., 2010<br>(Poland) [45]          |
| <hr/>      |                                                  |                                                 |                                                |
| Strawberry |                                                  | ↓ sVCAM-1,<br>= sICAM-1                         | Basu et al., 2010<br>(USA) [46]                |
| <hr/>      |                                                  |                                                 |                                                |
| Berry mix  | = 8-isoprostanes                                 | = serum leptin, leptin/BMI and resistin/BMI     | Puupponen-Pimiä et al., 2013<br>(Finland) [47] |

° In women with MetS only (group: fMetS).

Legend: The arrow ↑ or ↓ denotes significant increase or decrease, respectively. 1 arrow: significantly different at  $p < 0.05$ ; 2 arrows: significantly different at  $p < 0.01$ ; 3 arrows: significantly different at  $p < 0.001$ ; = : no effect;; AIX: augmentation index; AIX@75: augmentation index normalized to 75 beats per minute; AOPP: advanced oxidation protein

products; BMI: body mass index; CAT: catalase; CCR2: chemokine (C-C motif) receptor 2; cGMP: cyclic guanosine monophosphate; CRP: C-reactive protein; ET-1: endothelin-1; FLT3L: FMS-like tyrosine kinase 3 ligand; FMD: flow mediated dilation; GMCSF: Granulocyte-macrophage colony-stimulating factor; GSH-Px: glutathione peroxidase; HNE: 4-hydroxynonenal; HR: heart rate; hs-CRP: high sensitive C-reactive protein; IS: Inflammation Score (calculated based on the values of hsCRP, IL-6, IL-12, and LPS); IL-1 $\beta$ : interleukin 1 $\beta$ ; IL-4: interleukin 4; IL-6: interleukin 6; IL-10: interleukin 10; IL-12: interleukin 12; IL-12p70: interleukin 12 subunit p70; IFN- $\alpha$ : Interferon-alpha; MAP: mean arterial pressure; MDA: Malondialdehyde; MMD: monocyte to macrophage differentiation associated; NOx: total nitrates/nitrites; ox-LDL: oxidized low density lipoprotein; PWV: pulse wave velocity; RHI: reactive hyperemia index; sICAM: soluble intercellular Adhesion Molecule 1; SOD: superoxide dismutase; sVCAM: soluble vascular cell adhesion molecule 1; TBARS: thiobarbituric acid reactive substances; TGF- $\beta$ : transforming growth factor- $\beta$ ; TLR4: Toll-like receptor 4; TNF- $\alpha$ : tumor necrosis factor-alpha.
